# Supplementary material for: An amino acid-based supramolecular nanozyme by coordination self-assembly for cascade catalysis and enhanced chemodynamic therapy towards biomedical applications
Source: PubMed Central journal article supplement (PMC9417692; doi:10.1039/d1na00619c), 2021-09-16
Supplement: NA-003-D1NA00619C-s001.pdf [file NA-003-D1NA00619C-s001.pdf]

**Amino Acid-Based Supramolecular Nanozyme by Coordination Self-Assembly for Cascade Catalysis and Enhanced Chemodynamic Therapy towards Biomedical Applications**

Enhui Song,<sup>‡a</sup> Yongxin Li,<sup>‡\*a</sup> Lili Chen,<sup>a</sup> Xiaopeng Lan,<sup>\*a</sup> Changshun Hou,<sup>\*b</sup>  
Chunlei Liu,<sup>a</sup> and Chunzhao Liu<sup>\*a</sup>

<sup>a</sup>State Key Laboratory of Bio-fibers and Eco-textiles, Institute of Biochemical Engineering, Affiliated Qingdao Central Hospital, College of Materials Science and Engineering, Qingdao University, Qingdao 266071, China.

<sup>b</sup>Department of biomedical science, City University of Hong Kong, Hong Kong 999077. P. R. China.

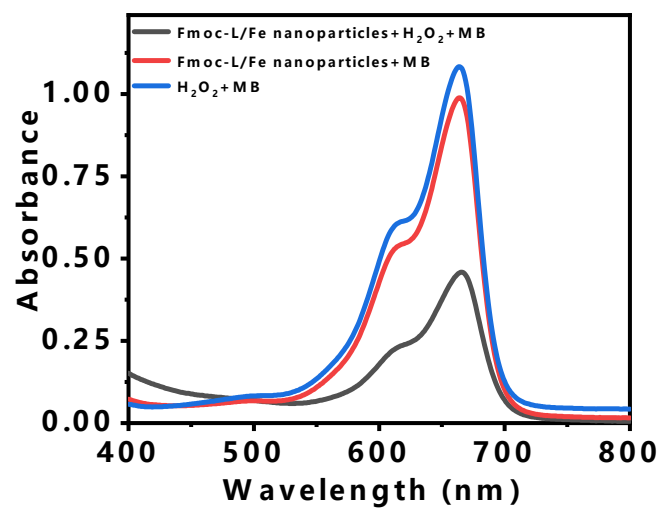

Fig. S1 The change on absorption of MB after treatment of Fmoc-L/Fe nanoparticles in the presence of H<sub>2</sub>O<sub>2</sub> compared with nanoparticles or H<sub>2</sub>O<sub>2</sub> alone.

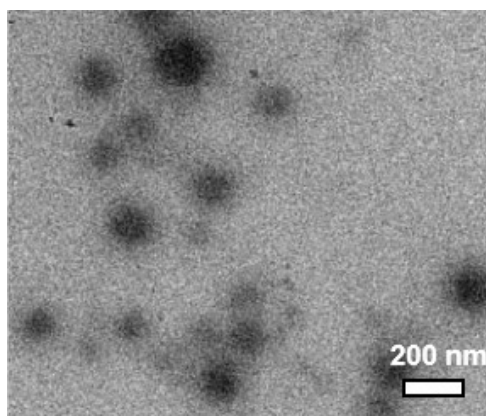

Fig. S2 TEM image of Fmoc-L/Fe/GOx nanoparticles.

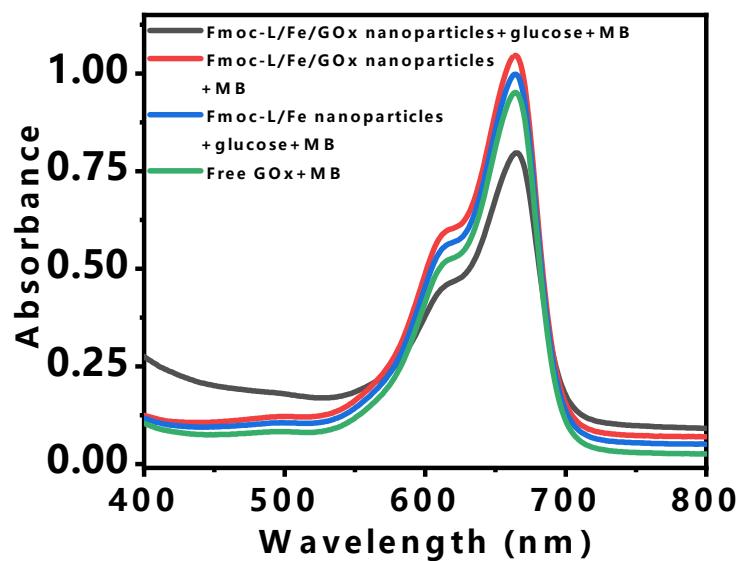

Fig. S3 The change on absorption of MB after treatment of Fmoc-L/Fe/GOx nanoparticles in the presence of glucose.

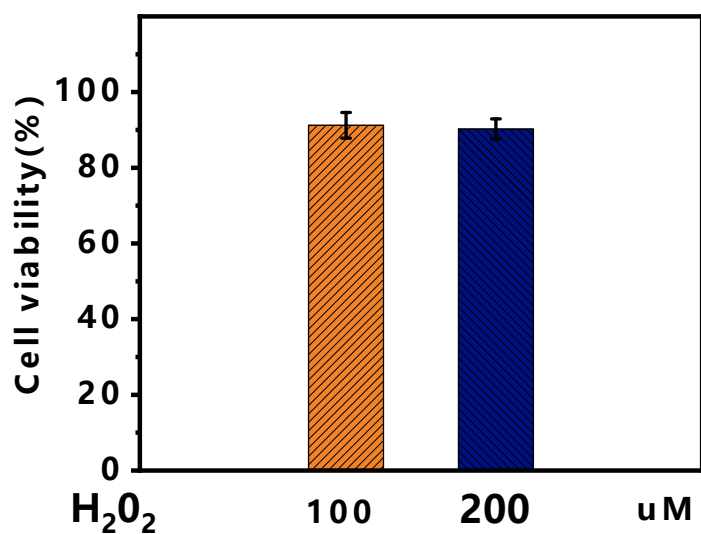

Fig. S4 The cell viability of MCF-7 cells after treatment with different concentration of H<sub>2</sub>O<sub>2</sub>.

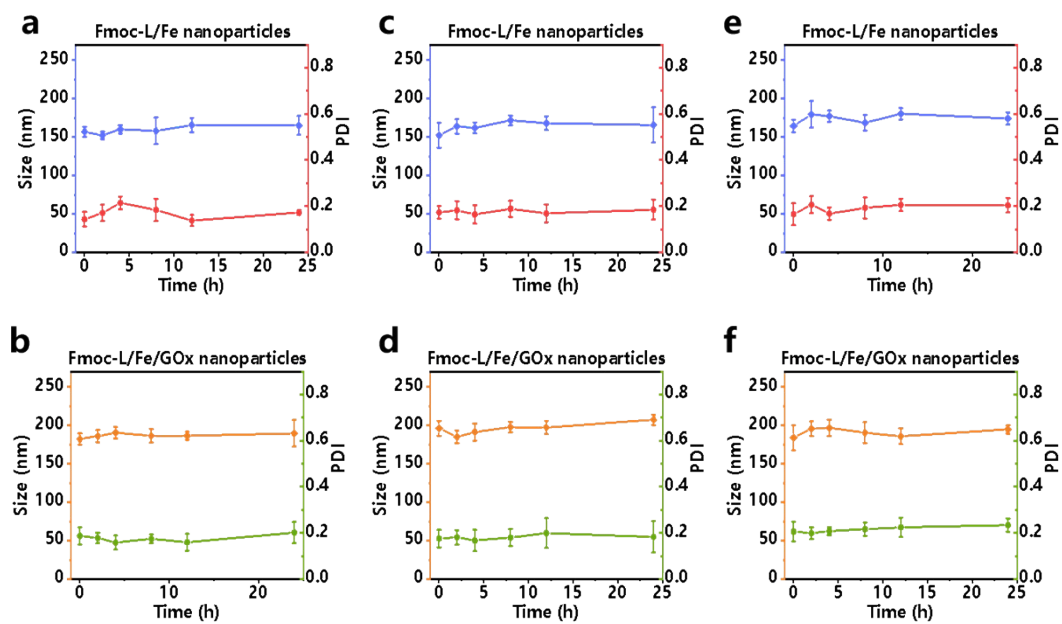

Fig. S5 The changes in the size and polymer dispersity index (PDI) of Fmoc-L/Fe nanoparticles (a) and Fmoc-L/Fe/GOx nanoparticles (b) after 10-fold (v/v) dilutions in water. The changes in the size and PDI of Fmoc-L/Fe nanoparticles (c) and Fmoc-L/Fe/GOx (d) nanoparticles in PBS. The changes in the size and PDI of Fmoc-L/Fe nanoparticles (e) and Fmoc-L/Fe/GOx nanoparticles (f) in DMEM with 10% fetal bovine serum (FBS) at 37 °C.
